# Supplementary material
Source: PubMed Central journal article supplement (PMC10528840)
Supplement: NIHMS1917593-supplement-322984_Major_Resources_Table.pdf [file NIHMS1917593-supplement-322984_Major_Resources_Table.pdf]

## Major Resources Table

### Data & Code Availability

| Description                                             | Source / Repository                                                                                                          | Persistent ID / URL                                                                                           |
|---------------------------------------------------------|------------------------------------------------------------------------------------------------------------------------------|---------------------------------------------------------------------------------------------------------------|
| UK Biobank data                                         | UK Biobank                                                                                                                   | <a href="https://www.ukbiobank.ac.uk/register-apply/">https://www.ukbiobank.ac.uk/register-apply/</a>         |
| Women's Health Initiative data (registered researchers) | Women's Health Initiative                                                                                                    | <a href="https://www.whi.org/datasets">https://www.whi.org/datasets</a>                                       |
| Women's Health Initiative data (other researchers)      | National Heart, Lung, and Blood Institute / Biologic Specimen and Data Repository Information Coordinating Center (BioLINCC) | <a href="https://biolincc.nhlbi.nih.gov/studies/whi_ctos">https://biolincc.nhlbi.nih.gov/studies/whi_ctos</a> |

### Other

| Description                 | Source / Repository                    | Persistent ID / URL                                                                                                 |
|-----------------------------|----------------------------------------|---------------------------------------------------------------------------------------------------------------------|
| R (version 4.1.3)           | R Foundation for Statistical Computing | <a href="https://www.r-project.org/">https://www.r-project.org/</a>                                                 |
| rmeta (version 3.0)         | Comprehensive R Archive Network (CRAN) | <a href="https://cran.r-project.org/web/packages/rmeta/">https://cran.r-project.org/web/packages/rmeta/</a>         |
| mediation (version 4.5.0)   | Comprehensive R Archive Network (CRAN) | <a href="https://cran.r-project.org/web/packages/mediation/">https://cran.r-project.org/web/packages/mediation/</a> |
| TwoSampleMR (version 0.5.6) | GitHub (MRCIEU/TwoSampleMR)            | <a href="https://mrcieu.github.io/TwoSampleMR/">https://mrcieu.github.io/TwoSampleMR/</a>                           |
| mr.raps (version 0.2)       | GitHub (qingyuanzhao/mr.raps)          | <a href="https://github.com/qingyuanzhao/mr.raps">https://github.com/qingyuanzhao/mr.raps</a>                       |
| ldsc (version 1.0.1)        | GitHub (bulik/ldsc)                    | <a href="https://github.com/bulik/ldsc">https://github.com/bulik/ldsc</a>                                           |
